# Supplementary material for: Y–F co-doping behavior of LiFePO4/C nanocomposites for high-rate lithium-ion batteries
Source: Royal Society of Chemistry journal article supplement (doi:10.1039/d0nj06081j), 2021-01-01
Supplement: d0nj06081j1.pdf [file d0nj06081j1.pdf]

## Supporting Information

# Y-F co-doping behavior of LFP/Carbon nanocomposites for high-rate lithium-ion batteries.

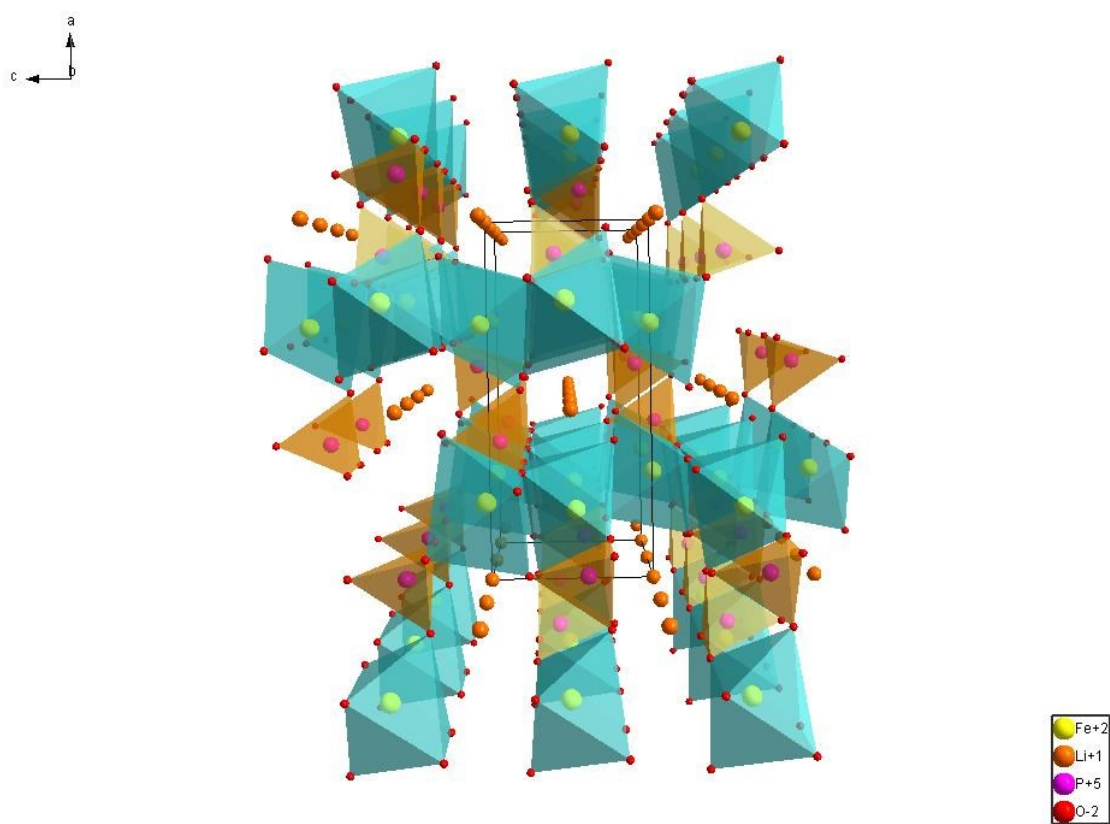

Fig. S1 Schematic diagram of the LFP structure along the b-axis (010) direction.

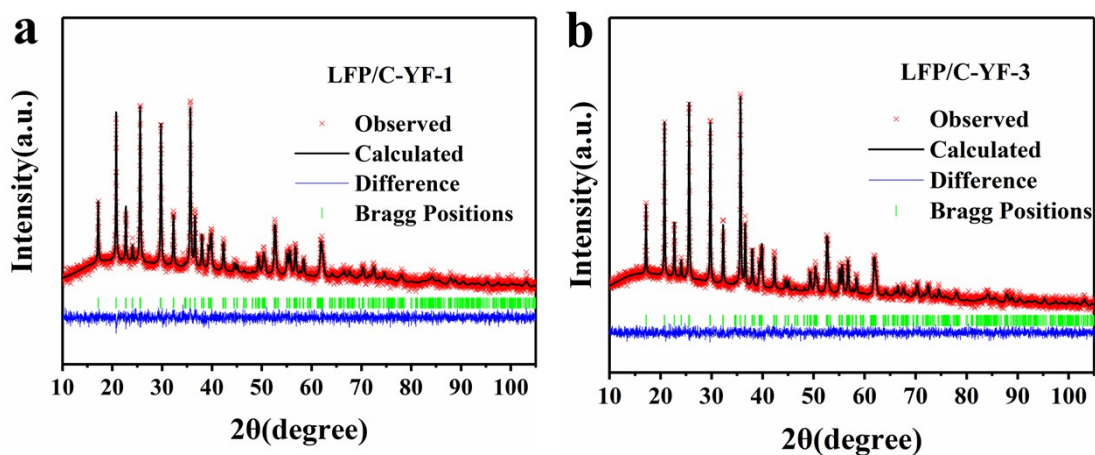

Fig. S2 XRD powder pattern (red points) and Rietveld fit (black lines) of a) LFP-YF-1 and b) LFP-YF-3.

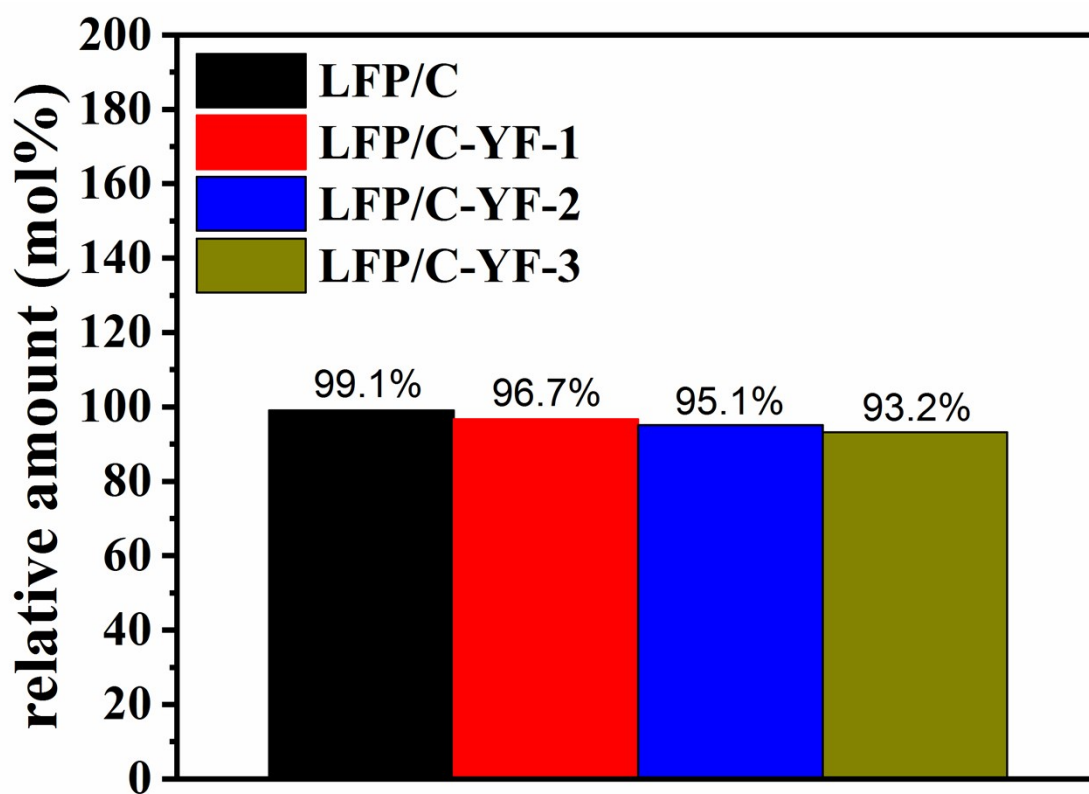

Fig. S3 ICP-OES plot of the molar percentage of Li of all samples.

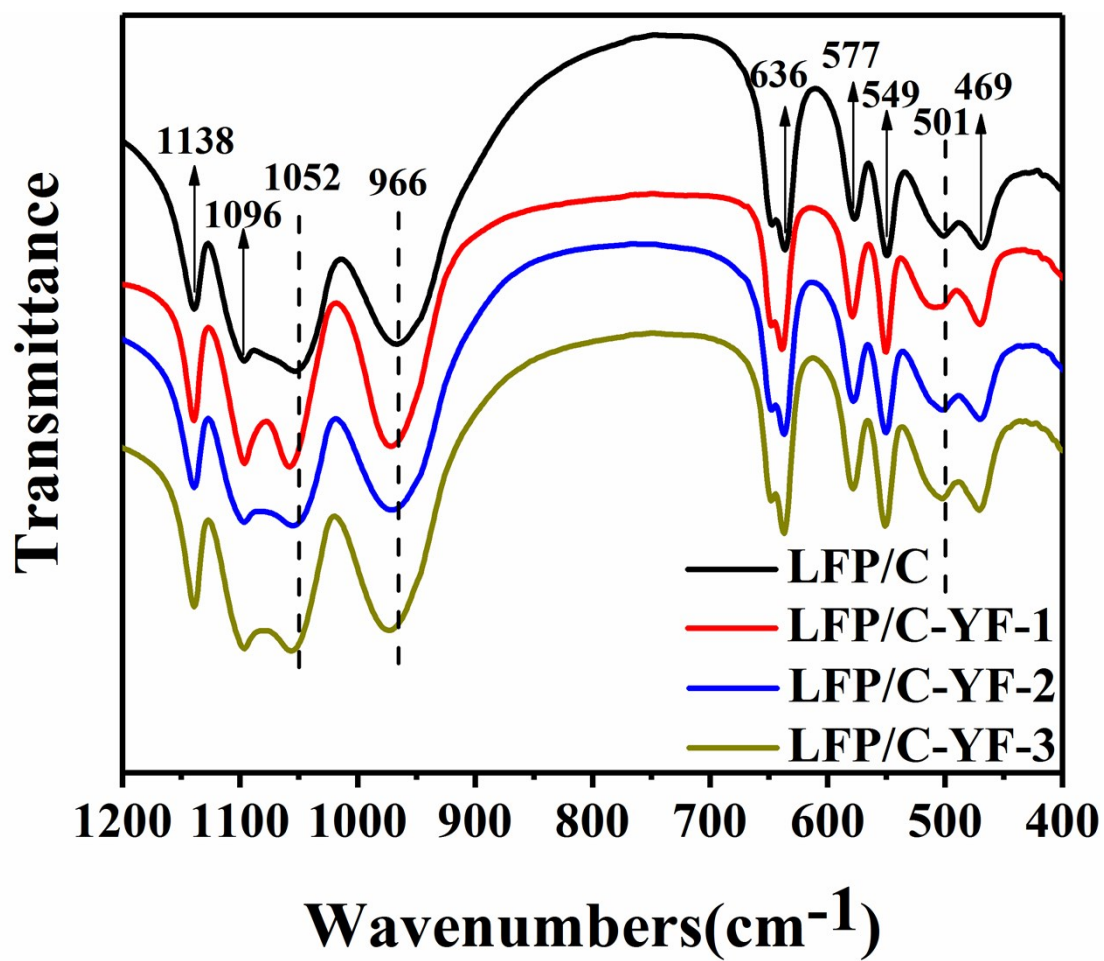

Fig. S4 FTIR spectrum of all the samples recorded in the wavenumber region of 400-1200 cm<sup>-1</sup>.

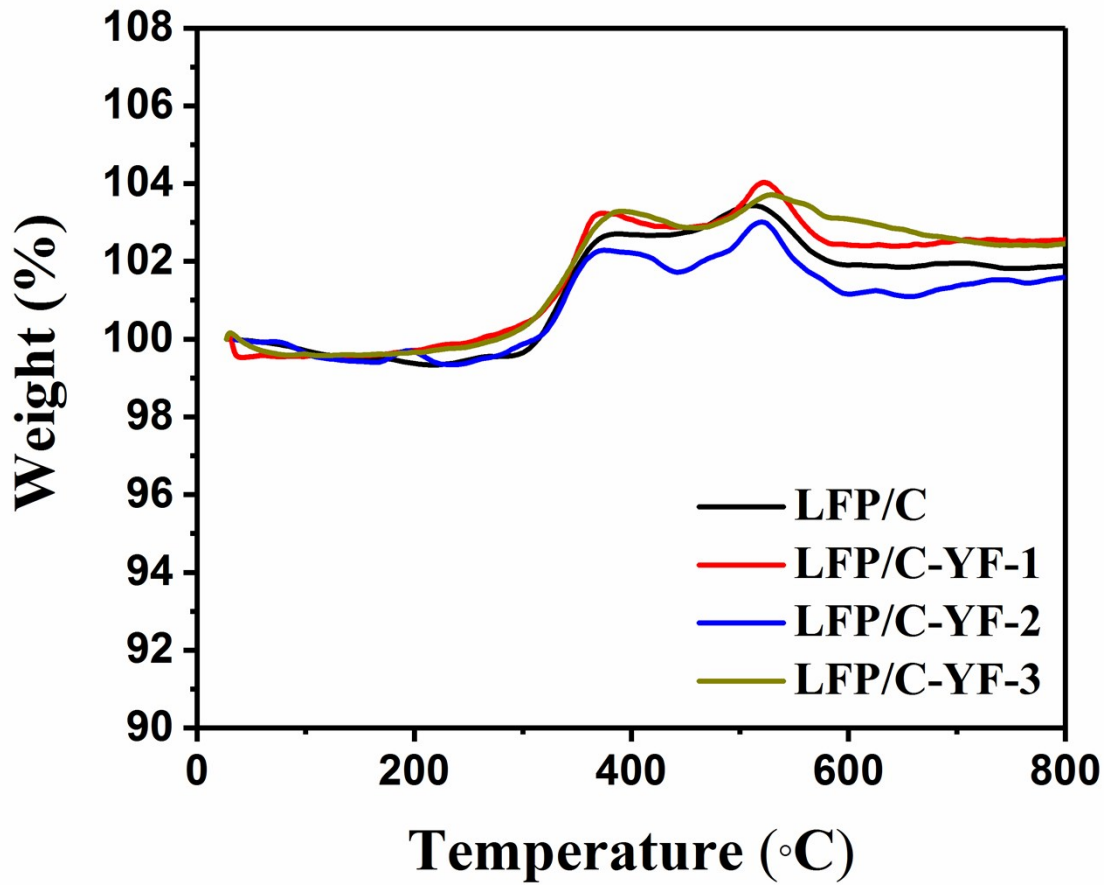

Fig. S5 TGA profiles of all the samples composites under air atmosphere with a heating rate of 10°C/min.

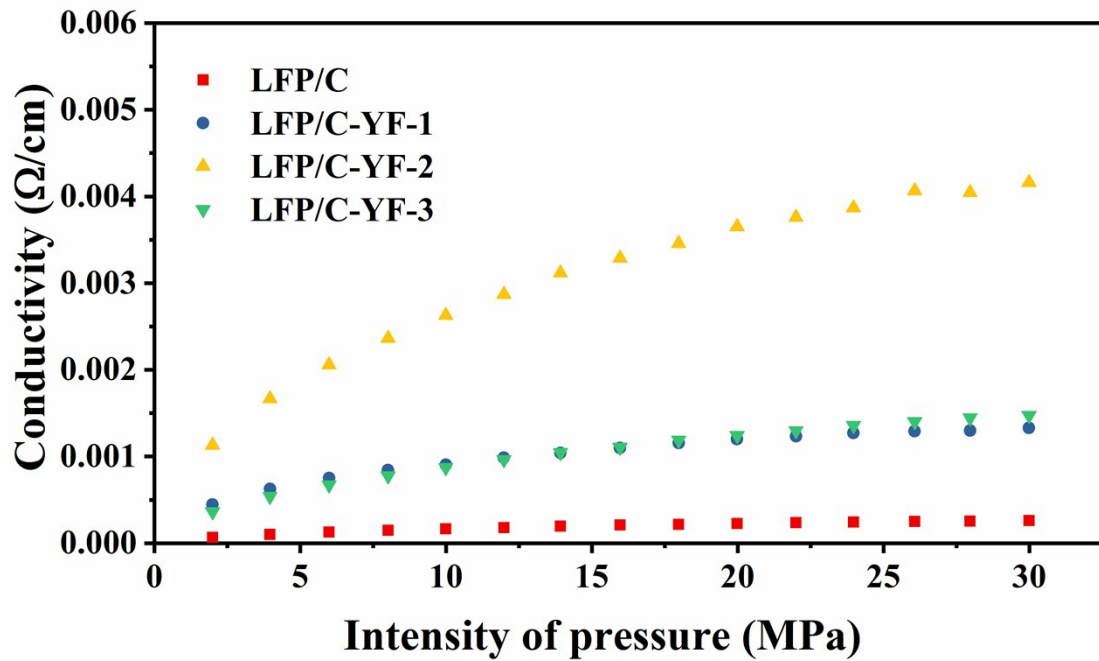

Fig. S6 The pressure-conductivity graph of all samples measured by the four-probe method.

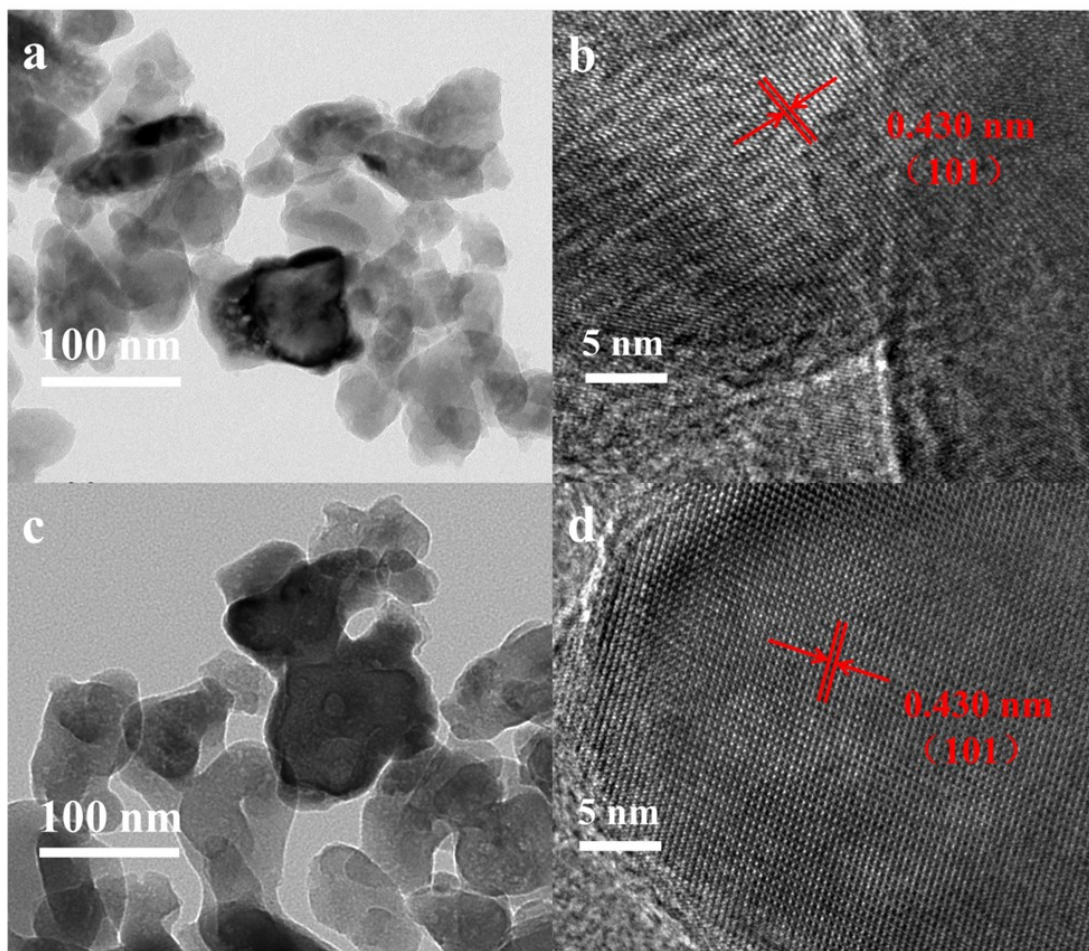

Fig. S7 TEM images and HRTEM images of a) b) LFP/C-YF-1 and c) d) LFP/C-YF-3.

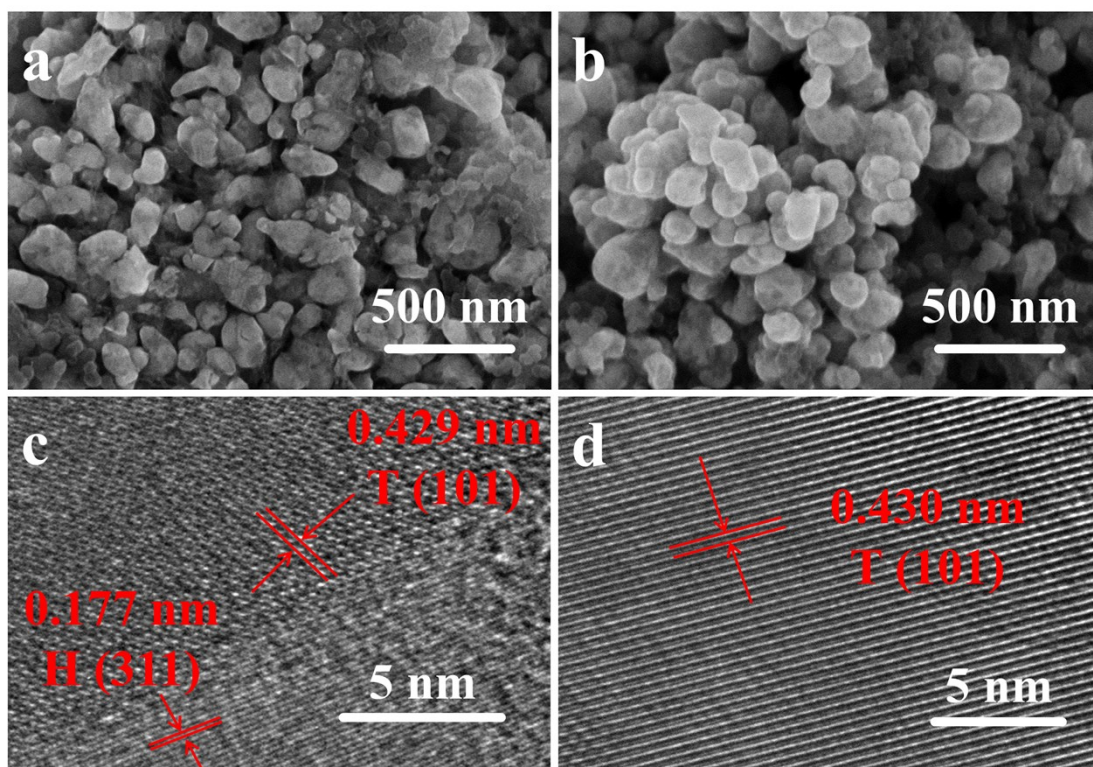

Fig. S8 SEM images and HRTEM images of a) c) LFP/C and b) d) LFP/C-YF-2 after 700 cycles at 5C.

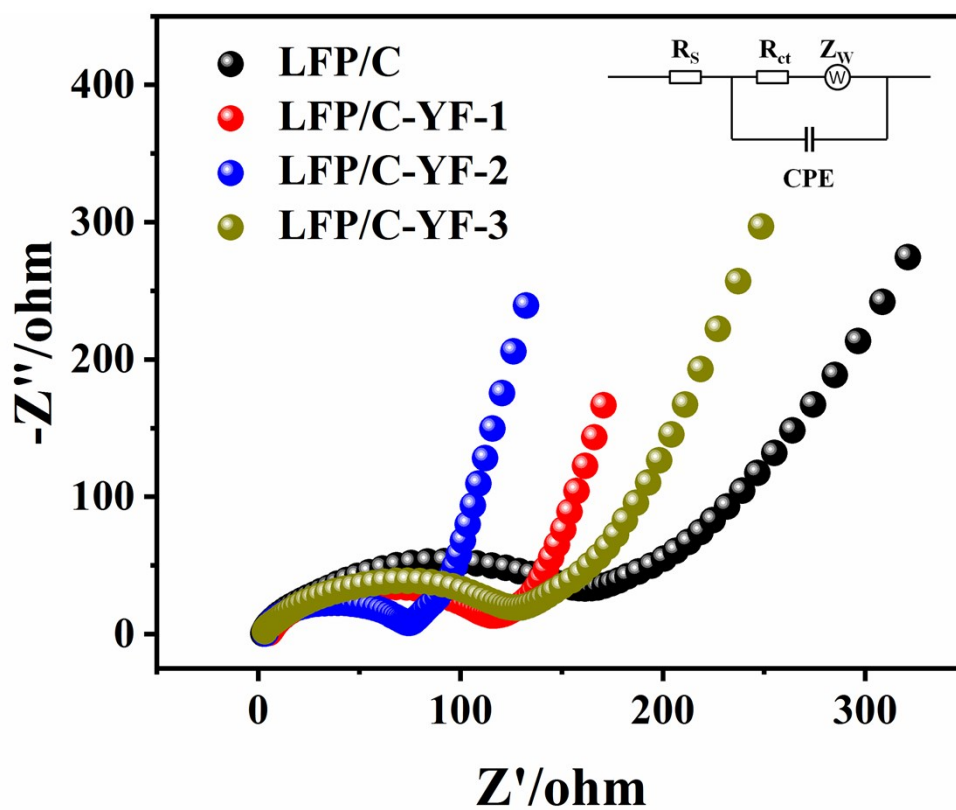

Fig. S9 Nyquist plots of all the samples with a frequency range of 0.1 Hz–100 kHz.

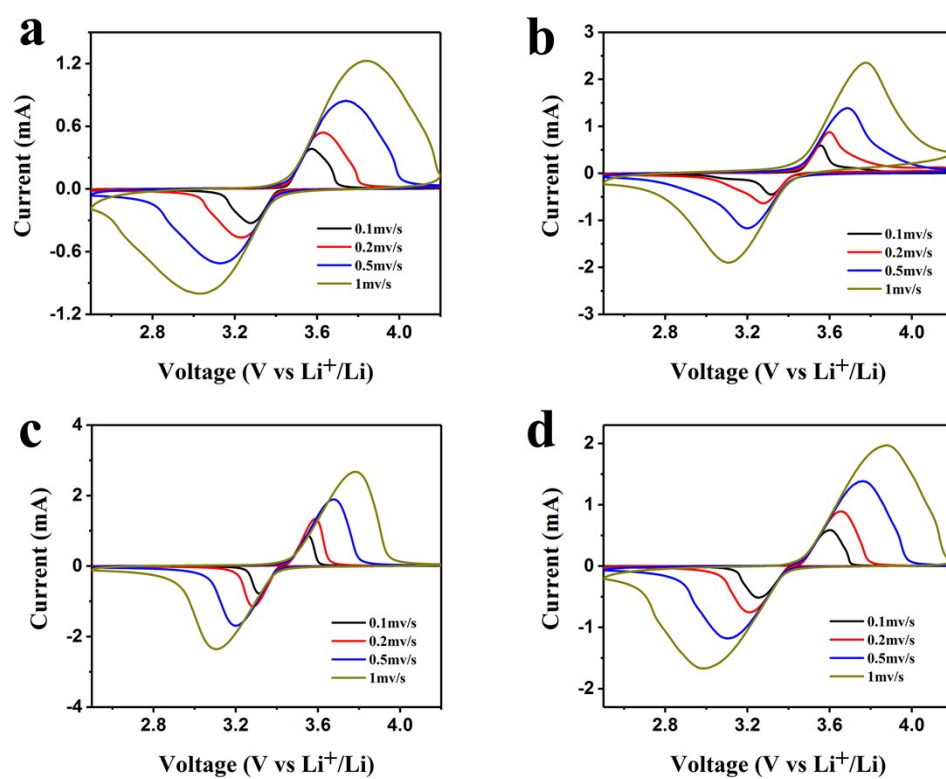

Fig. S10 the CV curves of a) LFP/C; b) LFP/C-YF-1; c) LFP/C-YF-2 and d) LFP/C-YF-3 composites at different scanning rates.

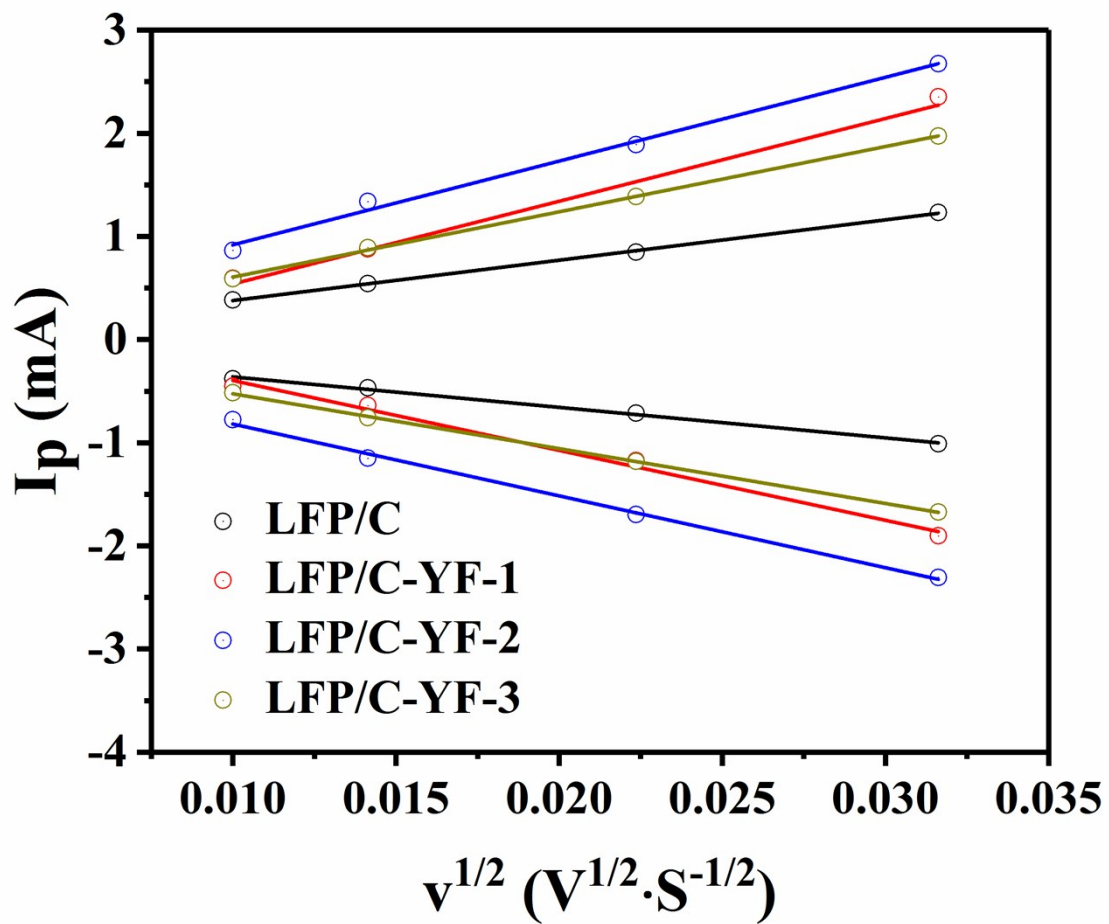

Fig. S11 relationship between the peak current and the square root of the scan rate.



Table S1 Selected bond lengths (in Å).

| M-O bond | LFP/C  | LFP/C-YF-1 | LFP/C-YF-2 | LFP/C-YF-3 |
|----------|--------|------------|------------|------------|
| Li-O(1)  | 2.1367 | 2.1794     | 2.1838     | 2.1678     |
| Li-O(2)  | 2.0866 | 2.0947     | 2.0860     | 2.1178     |
| Li-O(3)  | 2.1508 | 2.1891     | 2.1773     | 2.1891     |
| ΣLi-O    | 2.1247 | 2.1544     | 2.1490     | 2.1582     |
| P-O(1)   | 1.5311 | 1.5244     | 1.5141     | 1.5406     |
| P-O(2)   | 1.5741 | 1.4859     | 1.5238     | 1.4646     |
| P-O(3)   | 1.5188 | 1.5633     | 1.5712     | 1.5599     |
| ΣP-O     | 1.5413 | 1.5245     | 1.5364     | 1.5217     |

Table S2 Calculated the Rs, Rct and DLi of all samples.

| Sample     | Rs/Ω | Rct/Ω | State     | Slope  | DLi/cm <sup>2</sup> ·s |
|------------|------|-------|-----------|--------|------------------------|
| LFP/C      | 2.2  | 143.5 | Oxidation | 39.10  | 5.08×10 <sup>-10</sup> |
|            |      |       | Reduction | -29.58 | 2.91×10 <sup>-10</sup> |
| LFP/C-YF-1 | 5.2  | 99.1  | Oxidation | 80.22  | 1.70×10 <sup>-9</sup>  |
|            |      |       | Reduction | -67.75 | 1.22×10 <sup>-9</sup>  |
| LFP/C-YF-2 | 3.4  | 57.2  | Oxidation | 81.22  | 2.26×10 <sup>-9</sup>  |
|            |      |       | Reduction | -69.64 | 1.66×10 <sup>-9</sup>  |
| LFP/C-YF-3 | 2.1  | 113.1 | Oxidation | 63.30  | 8.89×10 <sup>-10</sup> |
|            |      |       | Reduction | -57.17 | 7.25×10 <sup>-10</sup> |

Table S3. LFP/C -related atomic occupancy information and calculation error value.

| Sample | Atom | occupancy | x         | y         | z         | Rwp   | Rp    | χ <sup>2</sup> |
|--------|------|-----------|-----------|-----------|-----------|-------|-------|----------------|
| LFP/C  | Li1  | 1         | 0         | 0         | 0         | 1.71% | 1.36% | 0.967          |
|        | Fe1  | 1         | 0.2821(5) | 0.25      | 0.9744(5) |       |       |                |
|        | P1   | 1         | 0.0959(3) | 0.25      | 0.4209(8) |       |       |                |
|        | O1   | 1         | 0.0918(2) | 0.25      | 0.7470(4) |       |       |                |
|        | O2   | 1         | 0.4550(7) | 0.25      | 0.2076(8) |       |       |                |
|        | O3   | 1         | 0.1609(5) | 0.0501(6) | 0.2838(4) |       |       |                |

Table S4 LFP/C-YF-1 -related atomic occupancy information and calculation error value.

| Sample     | Atom | occupancy | x              | y         | z         | Rwp   | Rp    | χ <sup>2</sup> |           |  |  |
|------------|------|-----------|----------------|-----------|-----------|-------|-------|----------------|-----------|--|--|
| LFP/C-YF-1 | Li1  | 1         | 0              | 0         | 0         | 1.77% | 1.40% | 1.022          |           |  |  |
|            | Fe1  | 0.9948(6) | 0.2822(1)      | 0.25      | 0.9737(6) |       |       |                |           |  |  |
|            | P1   | 1         | 0.0948(9)      | 0.25      | 0.4155(1) |       |       |                |           |  |  |
|            | O1   | 1         | 0.0979(5)      | 0.25      | 0.7404(6) |       |       |                |           |  |  |
|            | O2   | 0.9959(8) | 0.4607(3)      | 0.25      | 0.2003(9) |       |       |                |           |  |  |
|            | O3   | 1         | 0.1665(5)      | 0.0445(8) | 0.2840(1) |       |       |                |           |  |  |
|            | Y1   | 0.0051(3) | Fe1 occ. By Y1 |           |           |       |       |                | 0.0051(3) |  |  |
|            | F1   | 0.0040(2) | O2 occ. By F1  |           |           |       |       |                | 0.0040(2) |  |  |

Table S5 LFP/C-YF-2 -related atomic occupancy information and calculation error value.

| Sample     | Atom | occupancy | x              | y         | z         | Rwp       | Rp    | $\chi^2$ |
|------------|------|-----------|----------------|-----------|-----------|-----------|-------|----------|
| LFP/C-YF-2 | Li1  | 1         | 0              | 0         | 0         | 1.78%     | 1.43% | 1.037    |
|            | Fe1  | 0.9934(8) | 0.2823(5)      | 0.25      | 0.9749(6) |           |       |          |
|            | P1   | 1         | 0.0939(3)      | 0.25      | 0.4170(1) |           |       |          |
|            | O1   | 1         | 0.0986(4)      | 0.25      | 0.7398(4) |           |       |          |
|            | O2   | 0.9909(5) | 0.4570(2)      | 0.25      | 0.2054(5) |           |       |          |
|            | O3   | 1         | 0.1658(9)      | 0.0446(5) | 0.2818(1) |           |       |          |
|            | Y1   | 0.0065(1) | Fe1 occ. By Y1 |           |           | 0.0065(1) |       |          |
|            | F1   | 0.0090(4) | O2 occ. By F1  |           |           | 0.0090(4) |       |          |

Table S6 LFP/C-YF-3 -related atomic occupancy information and calculation error value.

| Sample     | Atom | occupancy | x              | y         | z         | Rwp        | Rp    | $\chi^2$ |
|------------|------|-----------|----------------|-----------|-----------|------------|-------|----------|
| LFP/C-YF-3 | Li1  | 1         | 0              | 0         | 0         | 1.75%      | 1.39% | 1.017    |
|            | Fe1  | 0.9878(6) | 0.2821(8)      | 0.25      | 0.9746(3) |            |       |          |
|            | P1   | 1         | 0.0957(3)      | 0.25      | 0.4161(2) |            |       |          |
|            | O1   | 1         | 0.0972(1)      | 0.25      | 0.7435(1) |            |       |          |
|            | O2   | 0.9896(8) | 0.4633(7)      | 0.25      | 0.1914(4) |            |       |          |
|            | O3   | 1         | 0.1666(1)      | 0.0444(1) | 0.2839(3) |            |       |          |
|            | Y1   | 0.0121(3) | Fe1 occ. By Y1 |           |           | 0.0121(3)) |       |          |
|            | F1   | 0.0103(1) | O2 occ. By F1  |           |           | 0.0103(1)  |       |          |

Table S7 The ICP analysis of LFP/C and LFP/C-YF-2composites after cycling, respectively (fully charged/discharge).

| samples    | Percentage of lithium in LiFePO <sub>4</sub> /mol/%<br>(after 700 cycles) |           |
|------------|---------------------------------------------------------------------------|-----------|
|            | charge                                                                    | discharge |
| LFP/C      | 13.46                                                                     | 78.72     |
| LFP/C-YF-2 | 11.36                                                                     | 96.88     |
